# Supplementary material for: Odor identification predicts the transition of patients with isolated RBD: A retrospective study
Source: PubMed Central journal article supplement (PMC9380141; doi:10.1002/acn3.51615), 2022-06-29

## At baseline assessment

Between October 2009 and April 2017

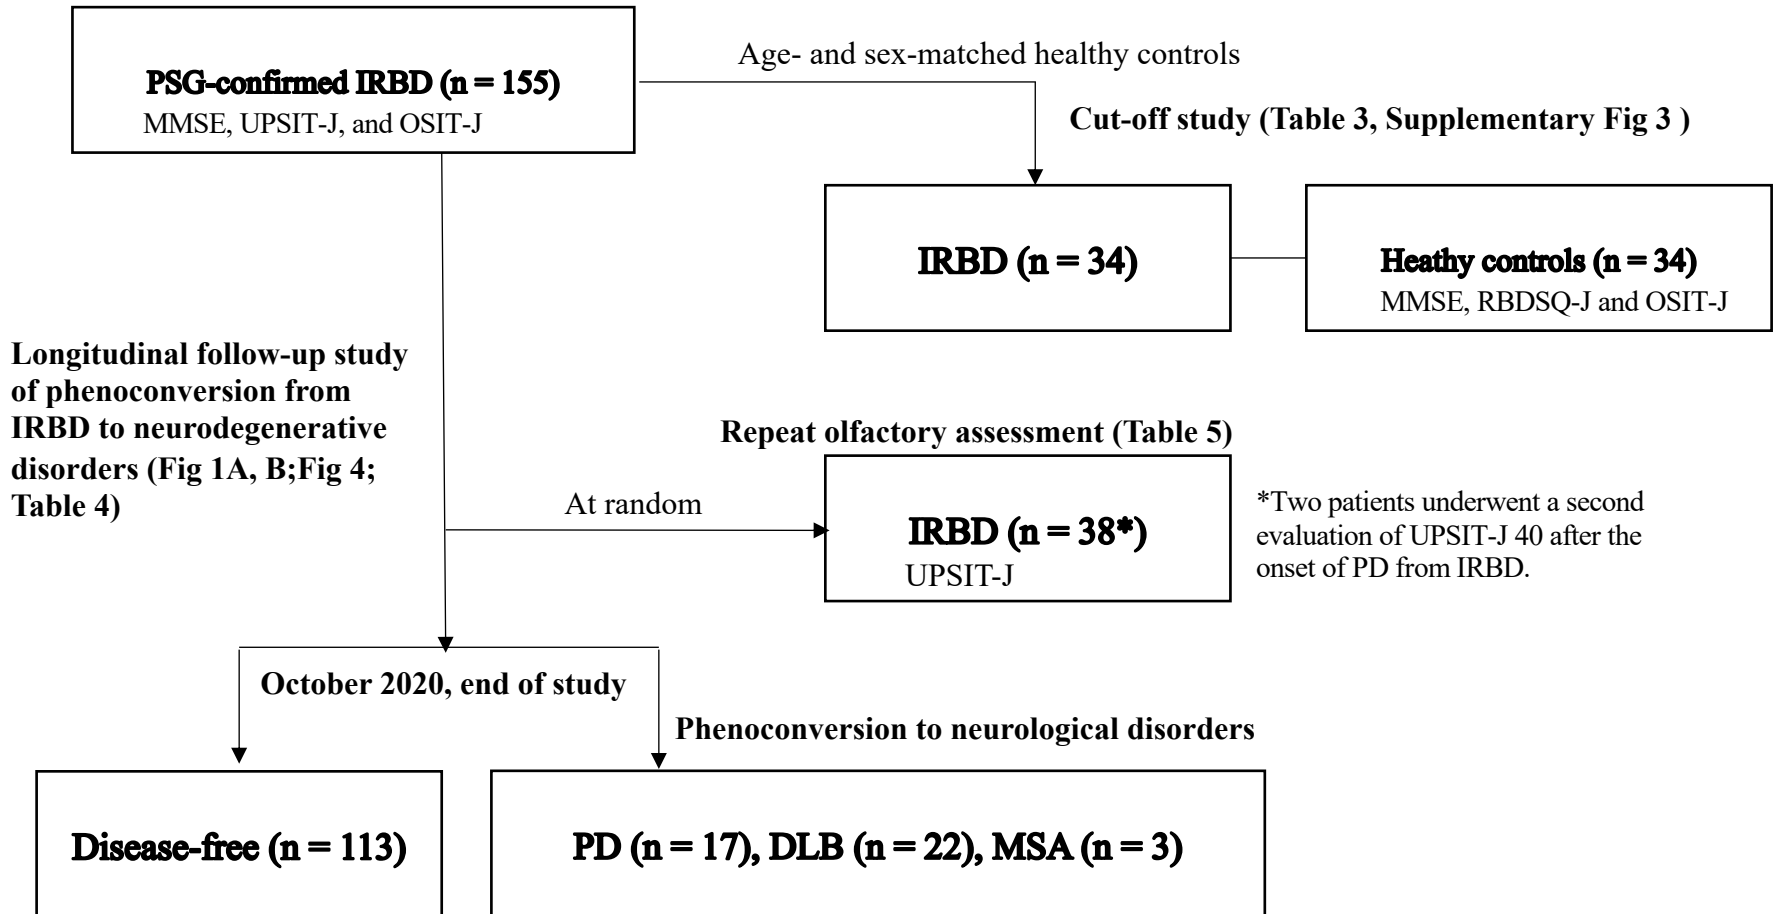

Supplement: ACN3-9-1177-s004.pdf [file ACN3-9-1177-s004.pdf]
